# Supplementary material
Source: PubMed Central journal article supplement (PMC6506801)
Supplement: ic9b00553_si_001.pdf [file ic9b00553_si_001.pdf]

**Supporting Information to**

**Aluminum complexes with redox-active formazanate ligand: Synthesis, characterization, and reduction  
chemistry**

Ranajit Mondol and Edwin Otten\*

Stratingh Institute for Chemistry, University of Groningen, Nijenborgh 4, 9747 AG Groningen, The  
Netherlands

**Contents**

|                           |     |
|---------------------------|-----|
| Experimental Section..... | S2  |
| Cyclic Voltammetry.....   | S4  |
| EPR Spectroscopy .....    | S8  |
| UV/Vis Spectroscopy ..... | S8  |
| NMR Spectra .....         | S9  |
| Computational Data .....  | S15 |

## Experimental Section

**Synthesis of [(PhNNC(*p*-tol)NNPh)AlEt<sub>2</sub>] (2a).** 3-*p*-tolyl-1,5-diphenyl-formazan **LH** (20 mg, 0.064 mmol) was dissolved in 0.5 mL of C<sub>6</sub>D<sub>6</sub> into a young NMR tube. To this cherry red formazan solution was added triethyl aluminum (10 μL, 0.070 mmol) at room temperature. The color of the solution changed rapidly from cherry-red to dark purple and gas evolution was observed. Then <sup>1</sup>H NMR was taken and which indicated the formation of expected product **2a**. <sup>1</sup>H NMR (400 MHz, C<sub>6</sub>D<sub>6</sub>, 25 °C) δ 8.22 (d, *J* = 8.1 Hz, 2H, *p*-tol *o*-H), 7.71 (d, *J* = 7.8 Hz, 4H, NPh *o*-H), 7.18 (d, *J* = 8.1 Hz, 2H, *p*-tol *m*-H), 7.08 (t, *J* = 7.8 Hz, 4H, NPh *m*-H), 6.98 (t, *J* = 7.3 Hz, 2H, NPh *p*-H), 2.17 (s, 3H, *p*-tol CH<sub>3</sub>), 1.08 (t, *J* = 8.1 Hz, 6H, AlEt CH<sub>2</sub>CH<sub>3</sub>), 0.42 (q, *J* = 8.1 Hz, 4H, AlEt CH<sub>2</sub>CH<sub>3</sub>).

**Synthesis of [(PhNNC(*p*-tol)NNPh)Al(Et)I] (3a).** Following the same synthetic procedure as mention above compound **2a** was synthesized in a young NMR tube. After that to this NMR tube 2 equiv of Iodine (I<sub>2</sub>) was added and let it reacted for 30 hrs at room temperature. <sup>1</sup>H NMR indicated the formation of mono-iodo product [(PhNNC(*p*-tol)NNPh)Al(Et)I] **3a** instead of expected diiodide product [(PhNNC(*p*-tol)NNPh)AlI<sub>2</sub>] **5**. Then NMR tube was heated at 40 °C for 6 hrs and no further conversion was observed. On further heating of NMR tube above 40 °C compound started to decompose. <sup>1</sup>H NMR (400 MHz, C<sub>6</sub>D<sub>6</sub>, 25 °C) δ 8.08 (d, *J* = 8.2 Hz, 2H, *p*-tol *o*-H), 7.75 (d, *J* = 7.6 Hz, 4H, NPh *o*-H), 7.13 (d, *J* = 8.1 Hz, 2H, *p*-tol *m*-H), 7.03 (t, *J* = 7.5 Hz, 4H, NPh *m*-H), 6.99 – 6.93 (m, 2H, NPh *p*-H), 2.57 (q, *J* = 7.5 Hz, 2H, EtI), 2.16 (s, 3H, *p*-tol CH<sub>3</sub>), 1.31 (t, *J* = 7.5 Hz, 3H, EtI), 1.02 (t, *J* = 8.0 Hz, 3H, Al(Et)I CH<sub>2</sub>CH<sub>3</sub>), 0.66 (q, *J* = 8.1 Hz, 2H, Al(Et)I CH<sub>2</sub>CH<sub>3</sub>).

**Synthesis of [(PhNNC(*p*-tol)NNPh)AlMe<sub>2</sub>] (2b).** 3-*p*-tolyl-1,5-diphenyl-formazan **LH** (300 mg, 0.954 mmol) was dissolved in 20 mL of toluene into a Schlenk tube. To this cherry red formazan solution was added trimethyl aluminum (100 μL, 1.049 mmol) at room temperature. The color of the solution changed rapidly from cherry-red to dark purple and gas evolution was observed. The reaction mixture was stirred for overnight at room temperature. After that all the volatiles were removed in vacuo. <sup>1</sup>H NMR was taken for the crude products and which indicated the formation of expected product **2b**. The crude products were dissolved in hexane and

kept inside the freeze at -30 °C for crystallization. But, unfortunately no crystalline materials of **2b** were obtained. <sup>1</sup>H NMR (400 MHz, C<sub>6</sub>D<sub>6</sub>, 25 °C) δ 8.21 (d, *J* = 8.2 Hz, 2H, p-tol *o*-H), 7.67 (d, *J* = 8.0 Hz, 4H, NPh *o*-H), 7.18 (d, *J* = 8.2 Hz, p-tol *m*-H), 7.06 (t, *J* = 8.0 Hz, 4H, NPh *m*-H), 6.96 (t, *J* = 7.3 Hz, 2H, NPh *p*-H), 2.17 (s, 3H, p-tol CH<sub>3</sub>), -0.25 (s, 6H, Al CH<sub>3</sub>).

**Synthesis of [(PhNNC(*p*-tol)NNPh)Al(Me)I] (**3b**).** The compound **2b** was dissolved in 0.5 mL of C<sub>6</sub>D<sub>6</sub> into a young NMR tube. After that to this NMR tube 2 equiv of Iodine (I<sub>2</sub>) was added and let it reacted for 24 hrs at room temperature. <sup>1</sup>H NMR indicated the formation of mono-iodo product [(PhNNC(*p*-tol)NNPh)Al(Me)I] **3b** instead of expected diiodide product [(PhNNC(*p*-tol)NNPh)AlI<sub>2</sub>] **5** and the present of starting material **2b**. On heating the NMR tube at 80 °C compound started to decompose. <sup>1</sup>H NMR (400 MHz, C<sub>6</sub>D<sub>6</sub>, 25 °C) δ 8.21 (d, *J* = 8.2 Hz, 1H, p-tol *o*-H (**2b**)), 8.10 (d, *J* = 8.2 Hz, 2H, p-tol *o*-H (**3b**)), 7.71 (d, *J* = 8.2 Hz, 4H, NPh *o*-H (**3b**)), 7.67 (d, *J* = 8.2 Hz, 2H, NPh *o*-H (**2b**)), 7.18 (d, *J* = 8.2 Hz, 1H, p-tol *m*-H (**2b**)), 7.13 (d, *J* = 8.2 Hz, 2H, p-tol *m*-H (**3b**)), 7.06 (t, *J* = 8.0 Hz, 2H, NPh *m*-H (**2b**)), 7.03 – 6.97 (m, 6H, overlapped, NPh (*m+p*)-H (**3b**)), 6.96 (t, *J* = 7.3 Hz, 1H, NPh *p*-H (**2b**)), 2.17 (s, 1.5H, p-tol CH<sub>3</sub> (**2b**)), 2.16 (s, 3H, p-tol CH<sub>3</sub> (**3b**)), 0.30 (s, 3H, MeI), 0.17 (s, 3H, Al CH<sub>3</sub> (**3b**)), -0.25 (s, 3H, Al CH<sub>3</sub> (**2b**)).

## Cyclic Voltammetry

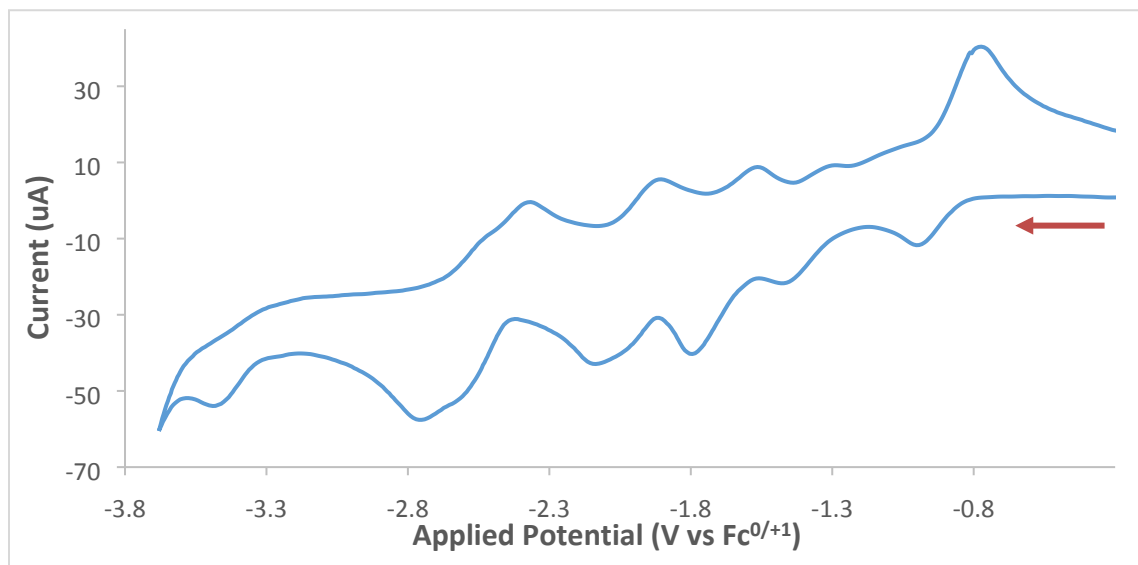

**Figure S1.** Cyclic voltammetry of **1** (1.5 mM solution in THF, 0.1 M [Bu<sub>4</sub>N][PF<sub>6</sub>]) recorded at 100 mVs<sup>-1</sup>

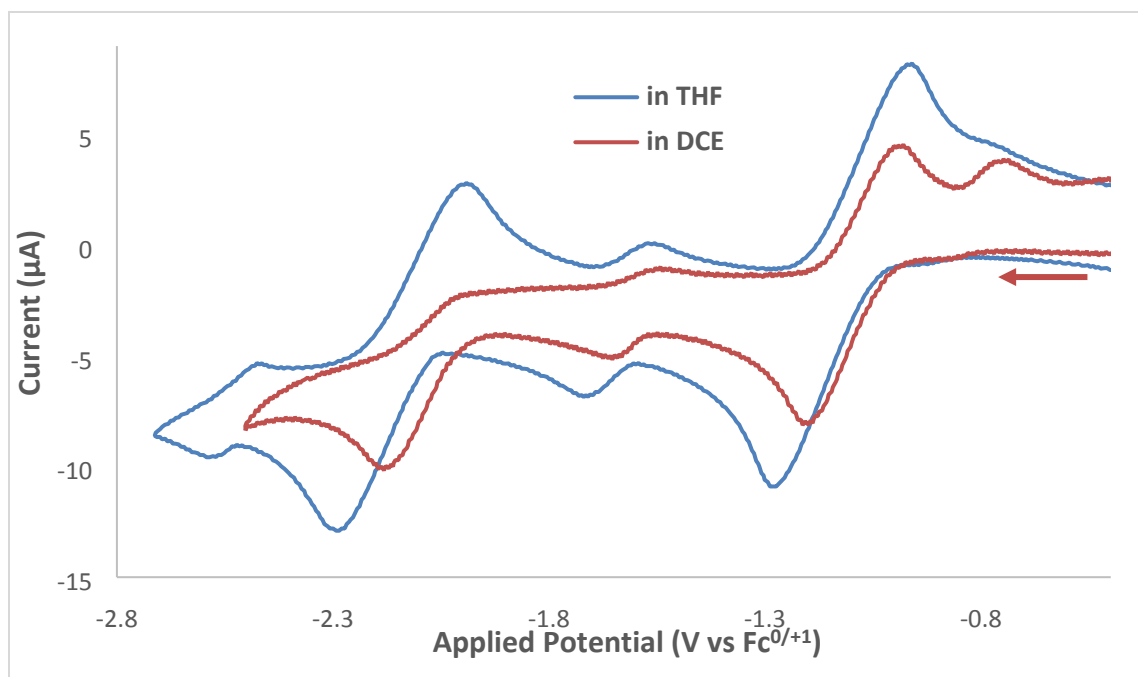

**Figure S2.** Cyclic voltammetry of **4** in THF (**blue**) and in DCE (**red**) [2.5mM **4**, 0.1M Bu<sub>4</sub>NPF<sub>6</sub>] recorded at 100 mVs<sup>-1</sup>

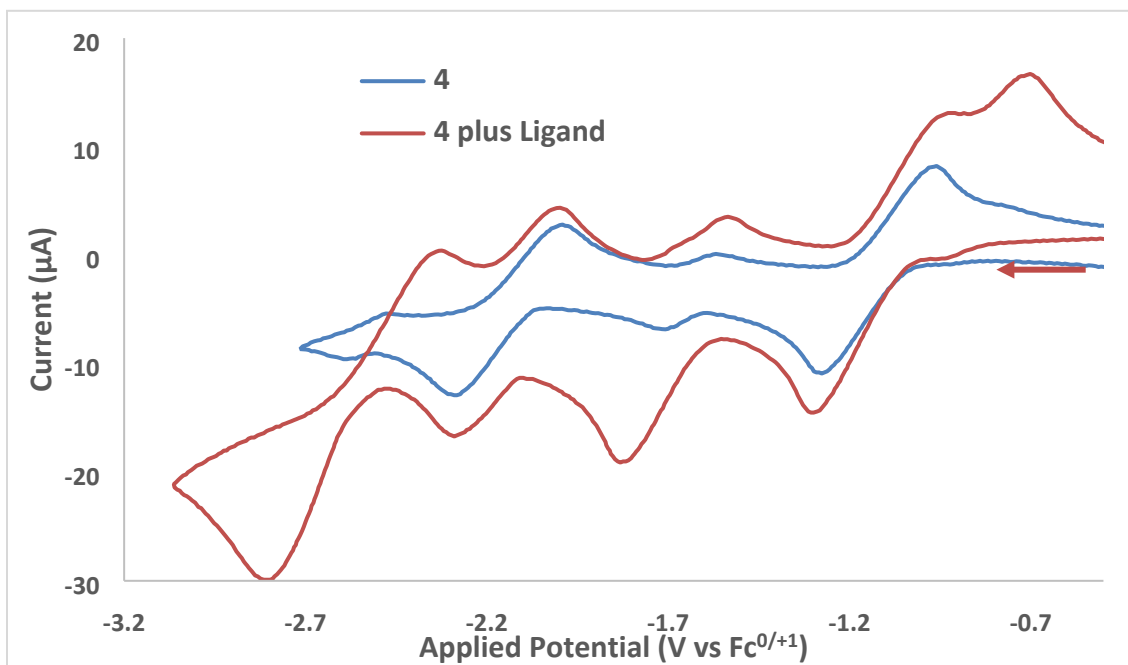

**Figure S3.** Cyclic voltammetry of **4** in THF [2.5mM **4**, 0.1M Bu<sub>4</sub>NPF<sub>6</sub>] recorded at 100 mVs<sup>-1</sup> (**blue**: before addition of free ligand, **red**: after addition of free ligand)

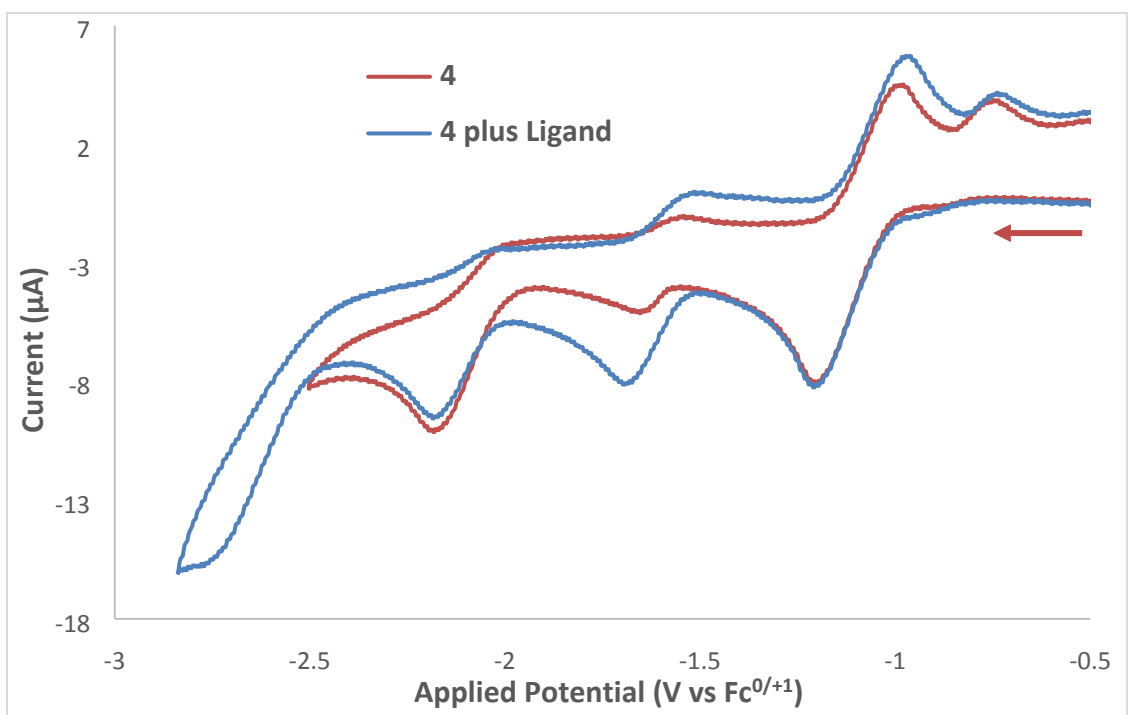

**Figure S4.** Cyclic voltammetry of **4** in DCE [2.5mM **4**, 0.1M Bu<sub>4</sub>NPF<sub>6</sub>] recorded at 100 mVs<sup>-1</sup> (**red**: before addition of free ligand, **blue**: after addition of free ligand)

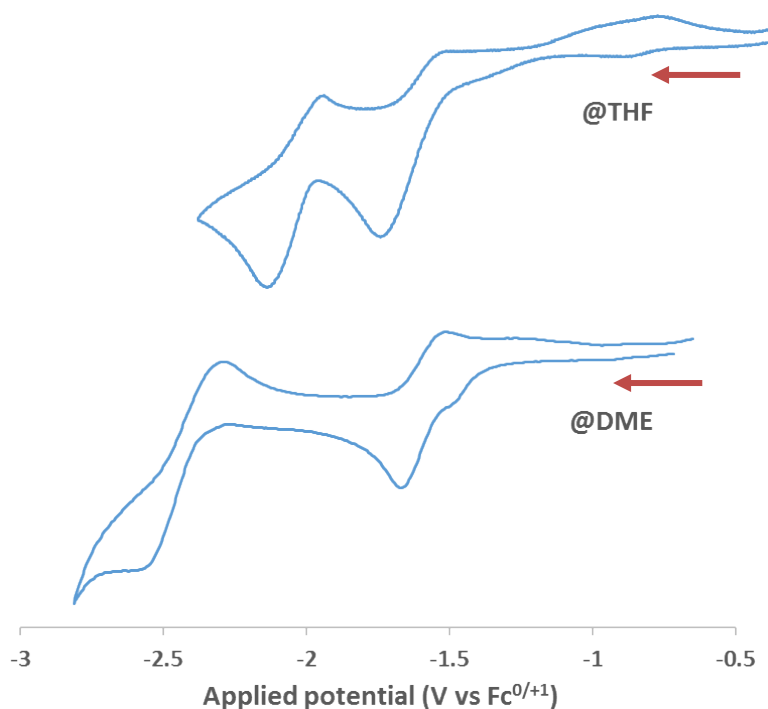

**Figure S5.** Cyclic voltammetry for **5** [2.5mM **5**, 0.1M Bu<sub>4</sub>NPF<sub>6</sub>] recorded at 100 mVs<sup>-1</sup> in THF (top) and in DME (bottom)

In contrast to the data for the diphenyl complex **4**, the voltammogram of the aluminum iodide **5** measured in either THF or DME solution is poorly reversible and shows reduction events that are shifted to more negative potentials (Figure S5 and Table S1). The changes in electrochemistry upon changing the Al-substituents from Ph to I may reflect the lability of the Al-I bond upon reduction. The peak potential difference between the 1<sup>st</sup> and 2<sup>nd</sup> reduction peaks ( $\Delta E_{pa} = E_{p,a1} - E_{p,a2}$ ) for **4** in THF is ca. 1.0 V, whereas the corresponding difference for **5** in THF and DME are ca. 0.37 and 0.89 V, respectively. The very small  $\Delta E_{pa}$  value for **5** in THF may be due to loss of I<sup>-</sup> upon reduction to form the neutral radical [LAl(I)(THF)]<sup>•</sup> as its THF adduct. The difference between THF and DME is likely due to the difference in coordinating ability between these two solvents. We propose that loss of I<sup>-</sup> does not occur in DME, and the second reduction forms [LAlI<sub>2</sub>]<sup>2-</sup> directly without the intermediacy of a neutral radical such as in THF (Scheme S1).

**Table S1.** Electrochemical data for compounds **4** and **5**

| Compounds | Solvents | 1 <sup>st</sup> reduction potential | 2 <sup>nd</sup> reduction potential | $\Delta E_{p,a}$ (V) |
|-----------|----------|-------------------------------------|-------------------------------------|----------------------|
|           |          | vs $\text{Fc}^{0/+1}$ (V)           | vs $\text{Fc}^{0/+1}$ (V)           |                      |
| <b>4</b>  | THF      | -1.13                               | -2.14                               | 1.0                  |
| <b>5</b>  | THF      | -1.75 (peak potential)              | -2.12 (peak potential)              | 0.37                 |
| <b>5</b>  | DME      | -1.67 (peak potential)              | -2.56 (peak potential)              | 0.89                 |

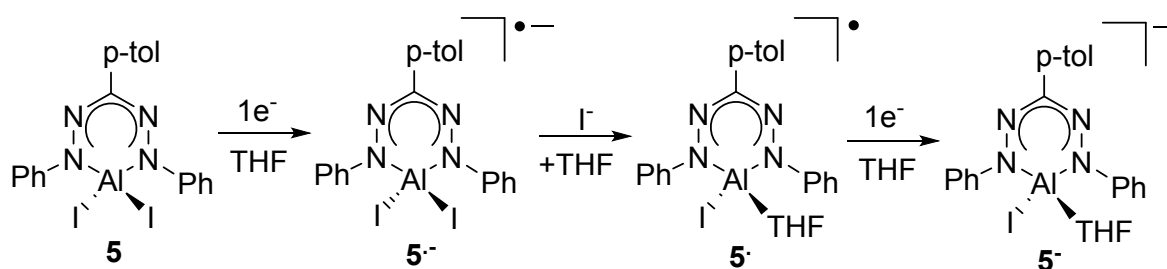**Scheme S1.** Schematic depiction of electrochemical processes in THF solution of **5**

### EPR Spectroscopy

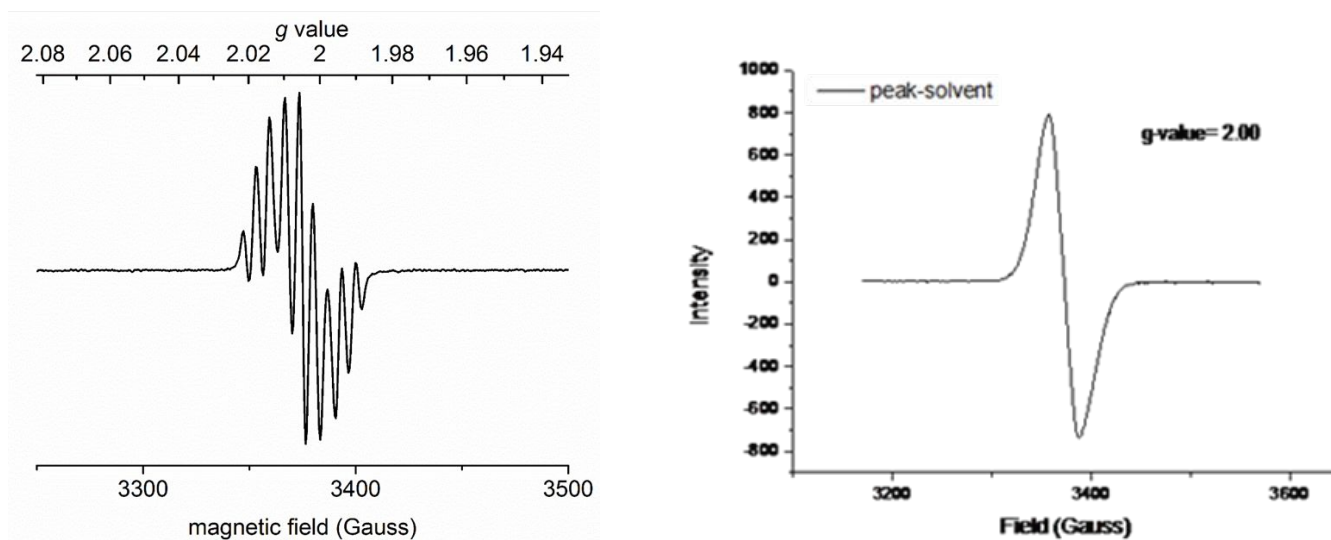**Figure S6.** EPR spectrum of **1<sup>•-</sup>** in (THF) (left) and **4<sup>•-</sup>** in DCE at room temperature

## UV/Vis Spectroscopy

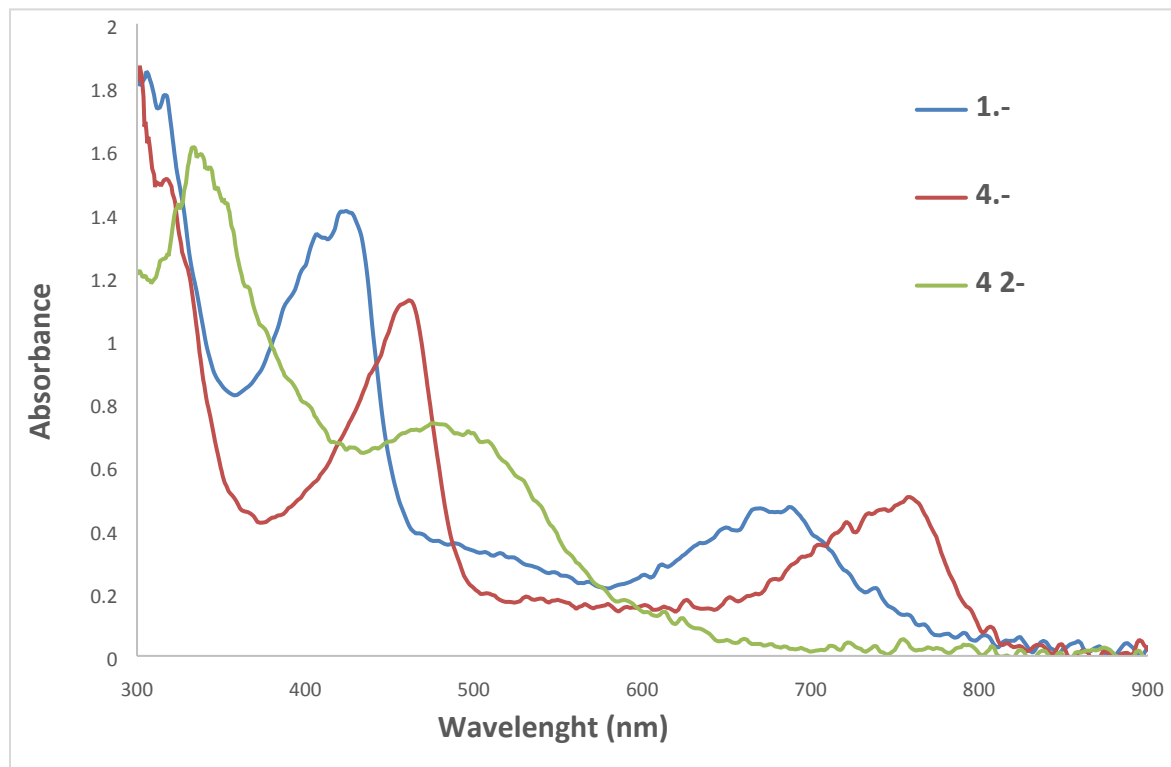

**Figure S7.** Absorption spectra of compounds **1-** (in THF), **4-** (in DCE) and **4<sup>2-</sup>** (in THF)

## NMR Spectra

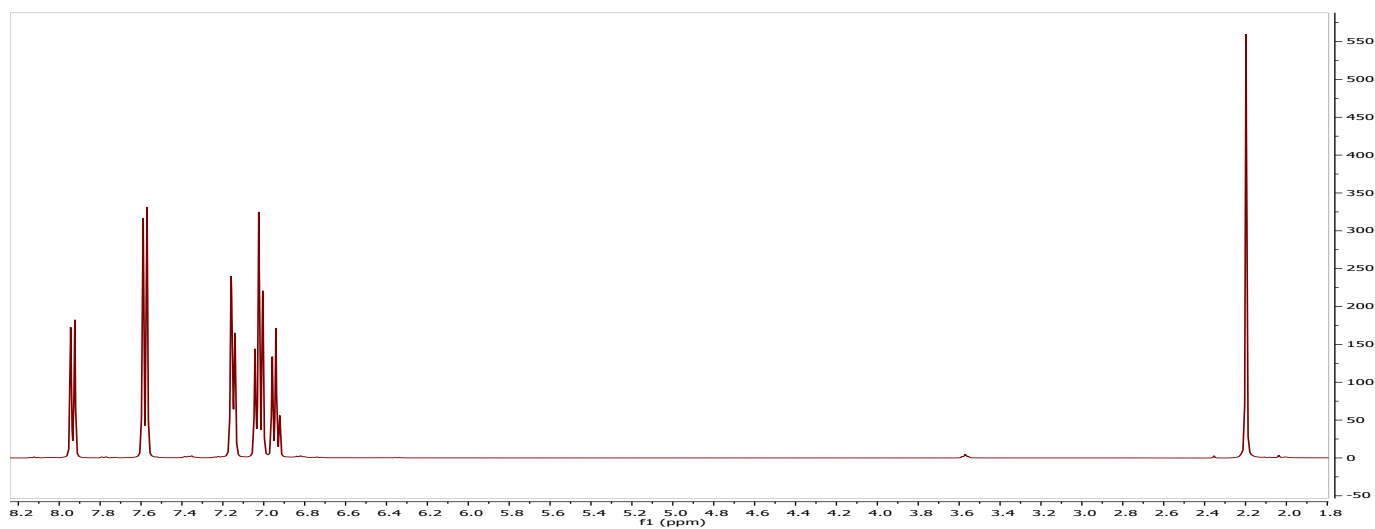



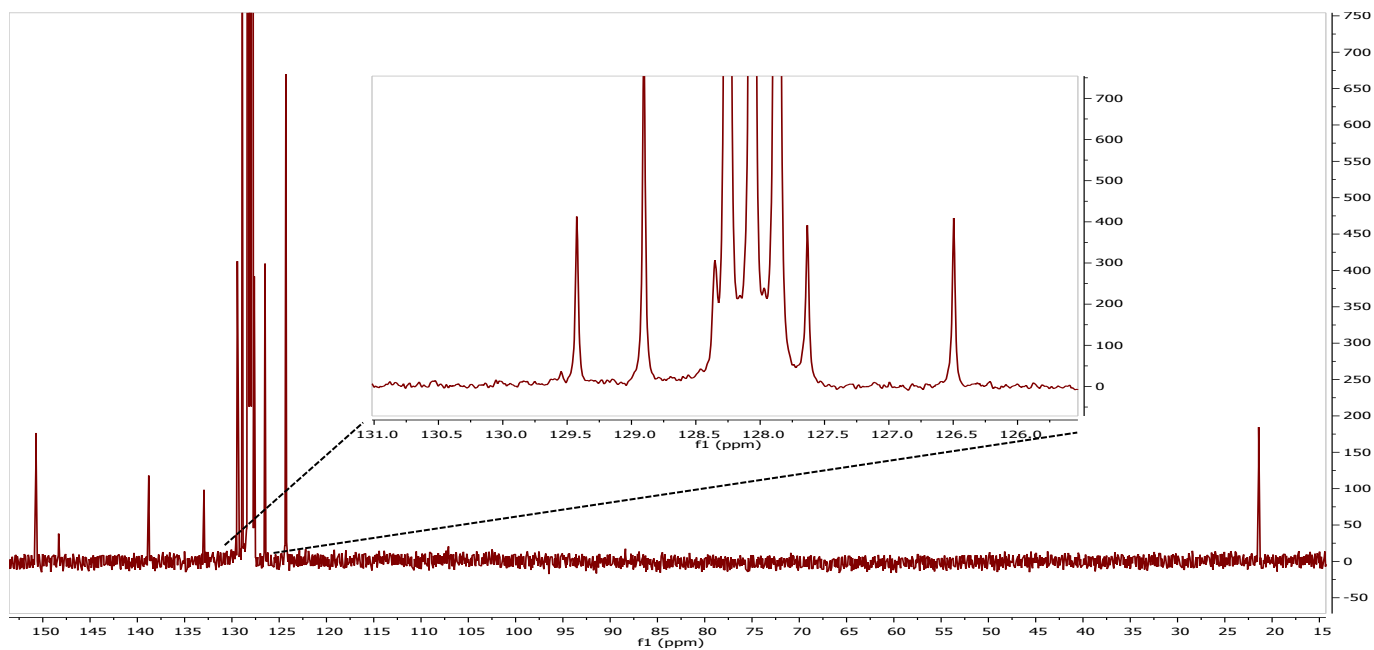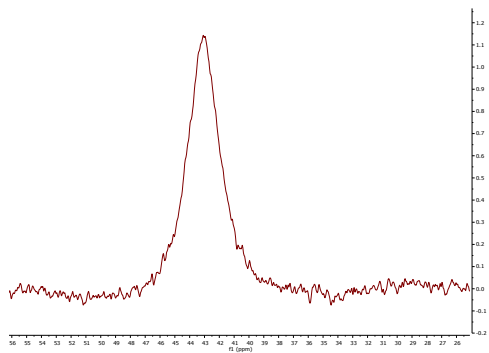

**Figure S8.**  $^1\text{H}$  NMR (top),  $^{13}\text{C}$  NMR (middle) and  $^{27}\text{Al}$  NMR (bottom) at 25 °C of **1** in  $\text{C}_6\text{D}_6$

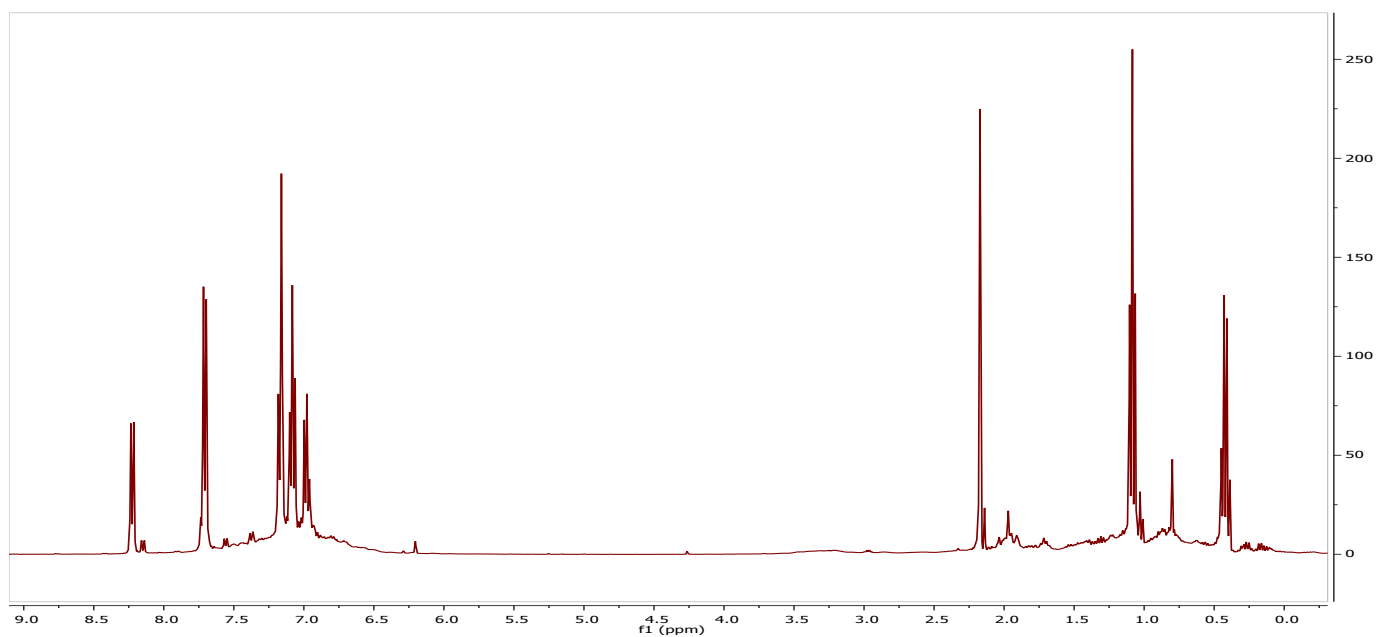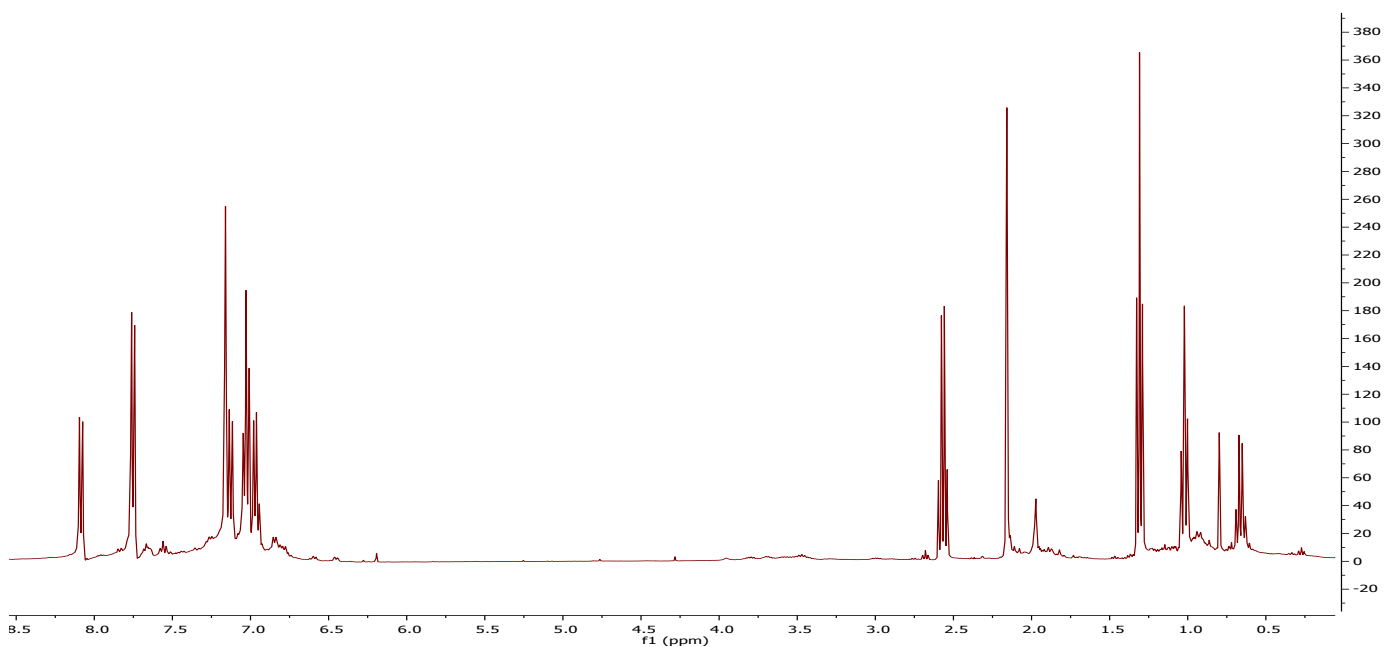

**Figure S9.** Compounds **2a** and **3a** were generated in young NMR tube.  $^1\text{H}$ -NMR of **2a** (shown NMR spectra is the crude product of **2a** without further purification) (top) and  $^1\text{H}$ -NMR of **3a** (the compound **3a** was generated in-situ from the crude product of **2a** and shown NMR spectra is the crude product of **3a** without further purification) (bottom) in  $\text{C}_6\text{D}_6$  at  $25^\circ\text{C}$

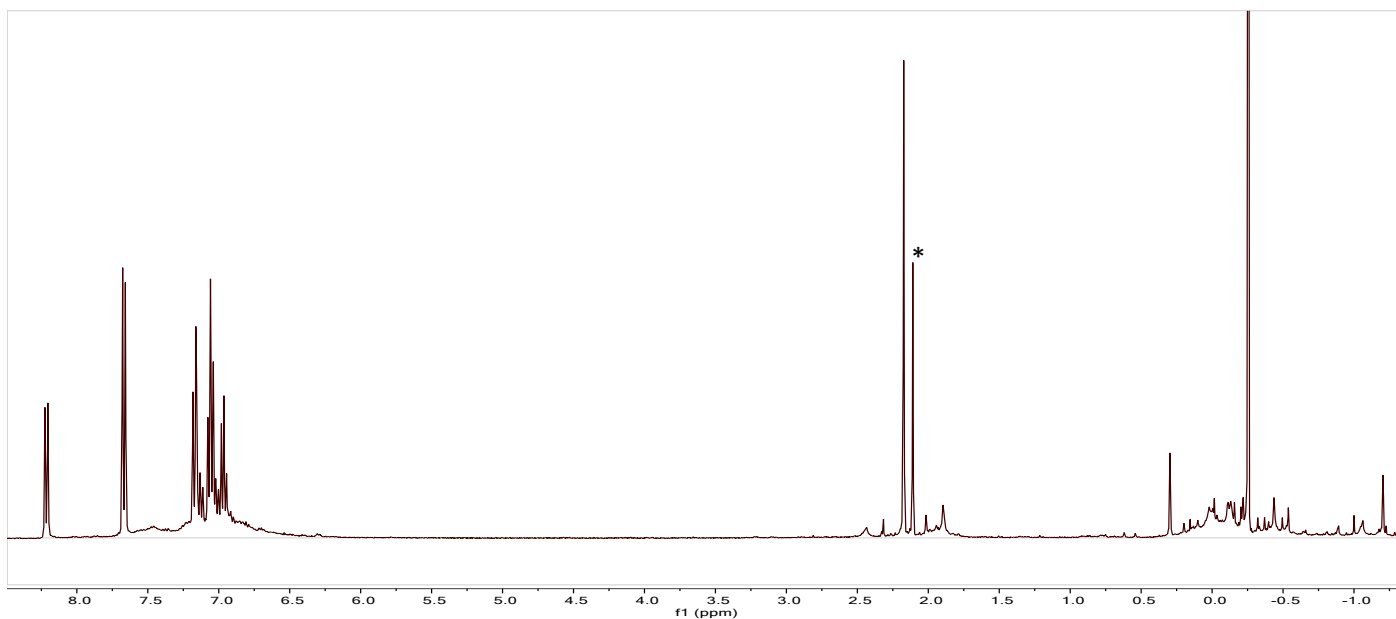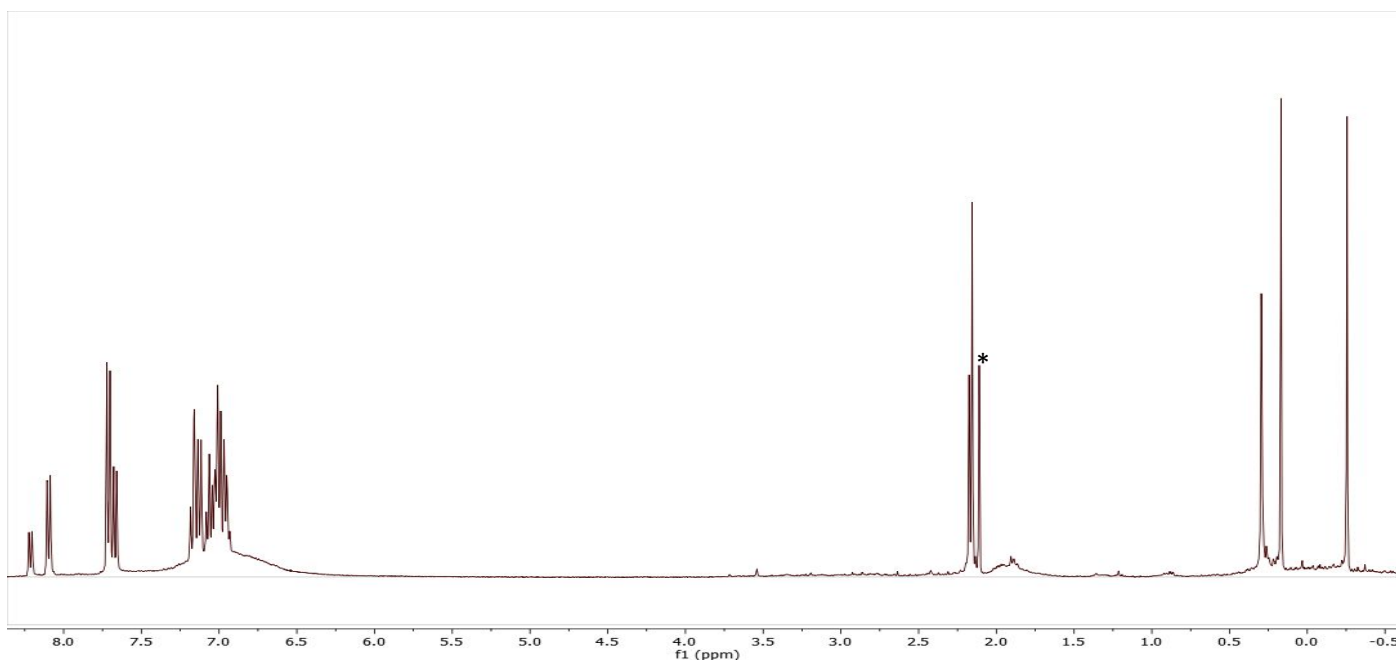

**Figure S10.**  $^1\text{H-NMR}$  of **2b** (shown NMR spectra is the crude product of **2b** without further purification) (top, asterisks indicate residual toluene) and  $^1\text{H-NMR}$  of **3b** (the compound **3b** was generated in young NMR tube by the treatment of the  $\text{C}_6\text{D}_6$  solution of crude product of **2b** with 2 equivalents of Iodine ( $\text{I}_2$ ) and shown NMR spectra is the crude product of **3b** without further purification) (bottom, asterisks indicate residual toluene) in  $\text{C}_6\text{D}_6$  at  $25^\circ\text{C}$

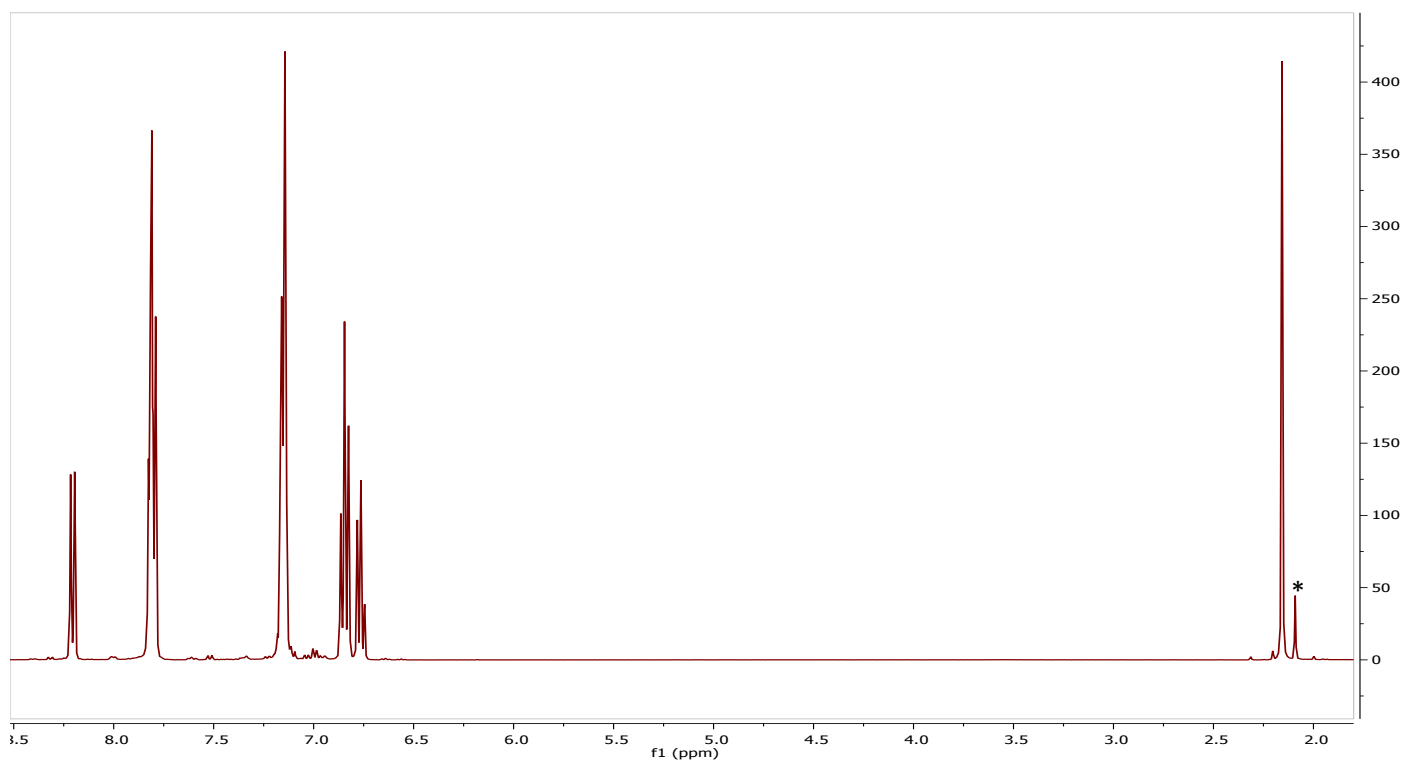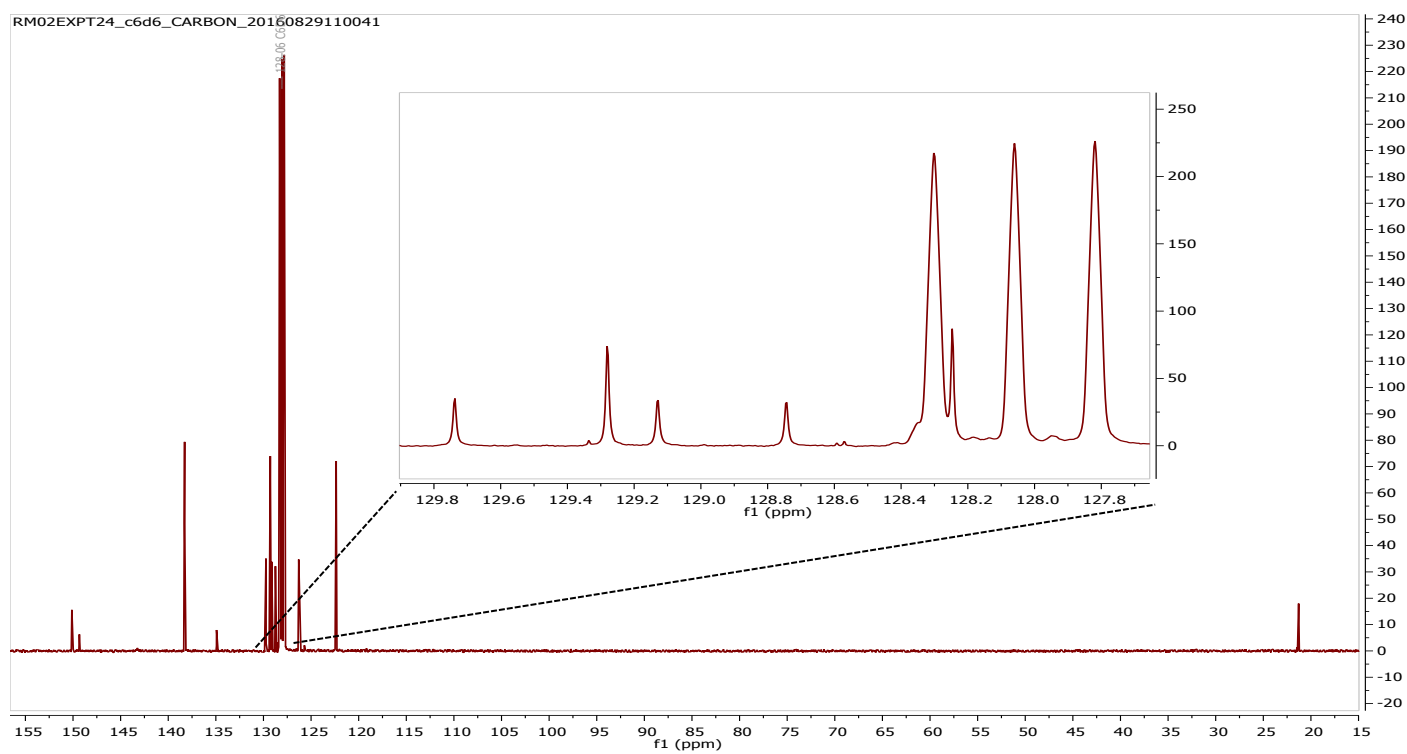

**Figure S11.**  $^1\text{H}$  NMR (at 25 °C) (top, asterisks indicate residual toluene) and  $^{13}\text{C}$  NMR (at 25 °C) (bottom) of **4** in  $\text{C}_6\text{D}_6$

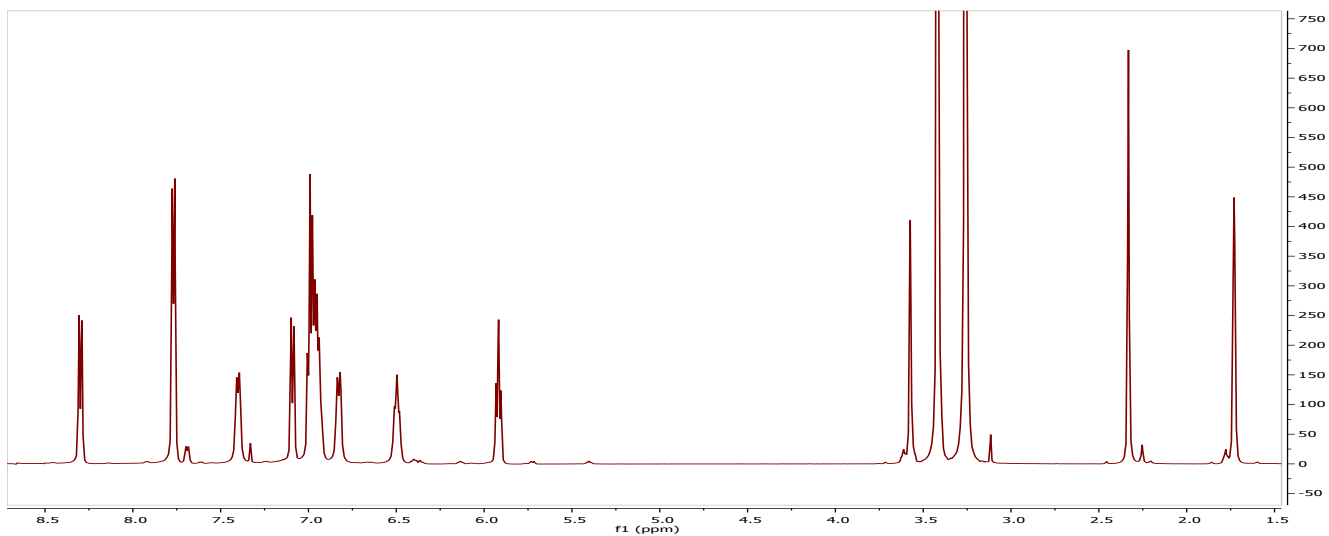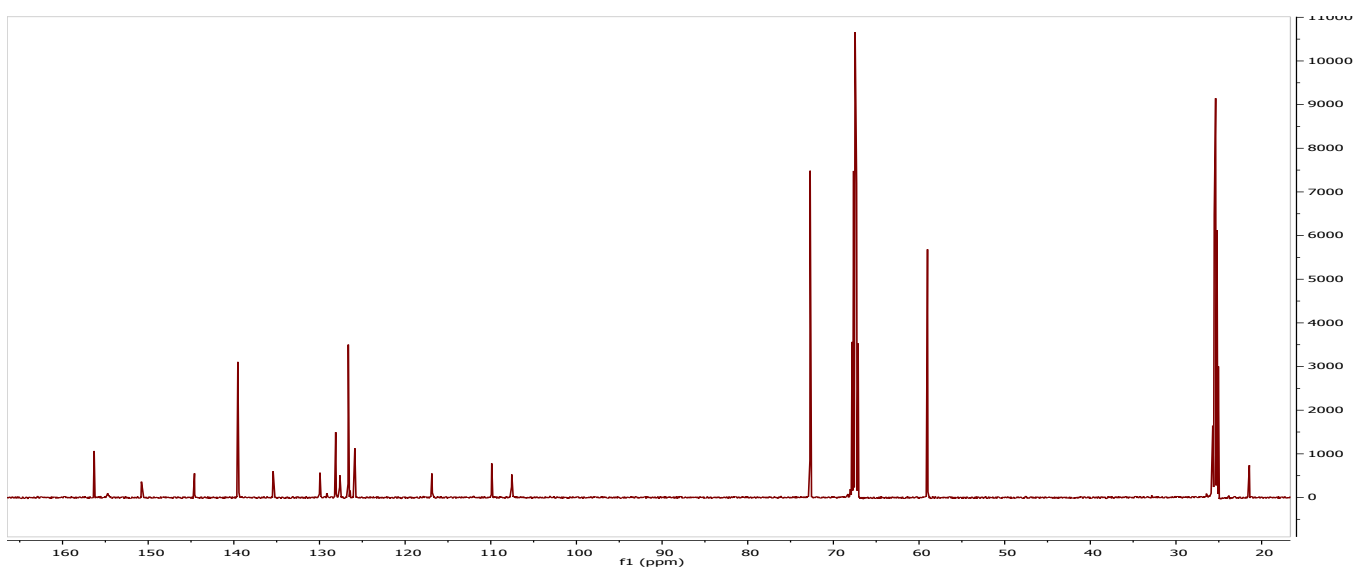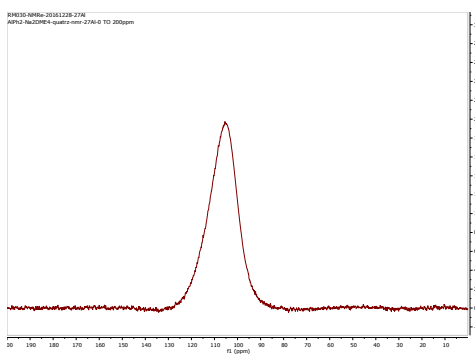

**Figure S12.**  $^1\text{H}$  NMR (at  $-30\text{ }^\circ\text{C}$ ) (Top),  $^{13}\text{C}$  NMR (at  $-30\text{ }^\circ\text{C}$ ) (Middle) and  $^{27}\text{Al}$  NMR (at  $25\text{ }^\circ\text{C}$ ) (Bottom) of  $42^-$  in  $\text{THF-d}_8$

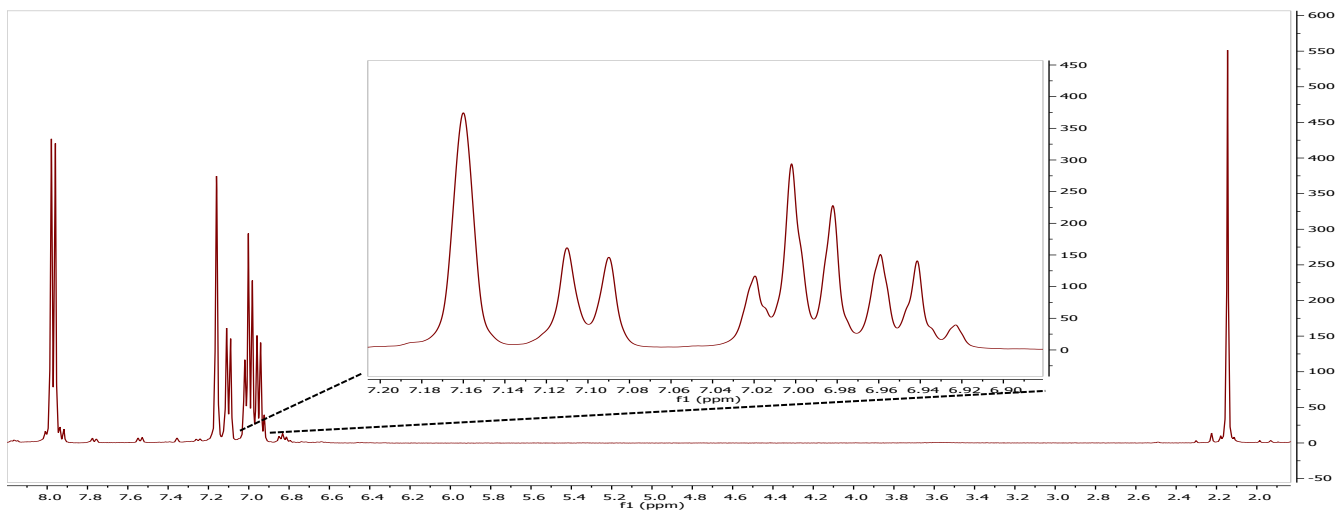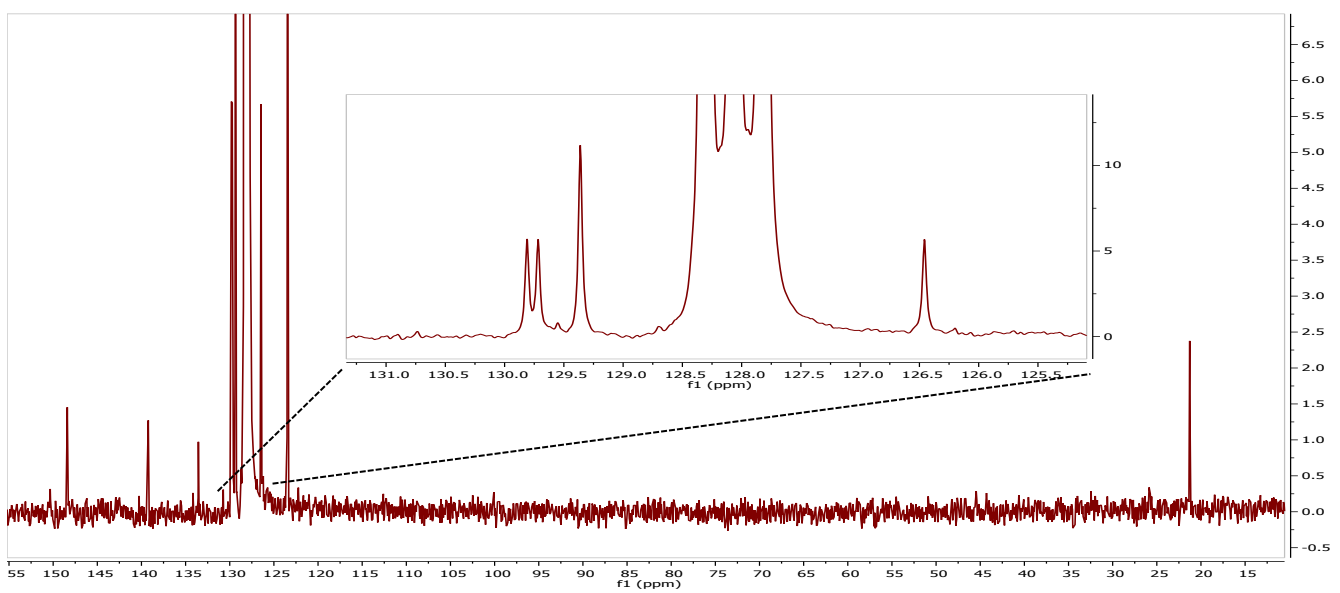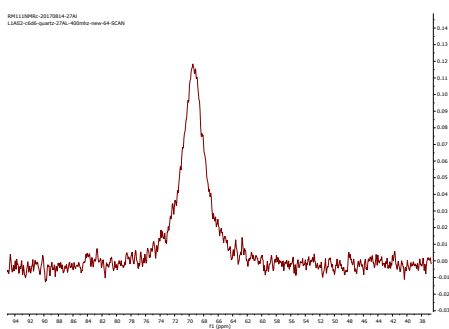

**Figure S13.** <sup>1</sup>H NMR (at 25 °C) (top), <sup>13</sup>C NMR (at 25 °C) (middle) and <sup>27</sup>Al NMR (at 25 °C) (bottom) of **5** in C<sub>6</sub>D<sub>6</sub>

## Computational Data

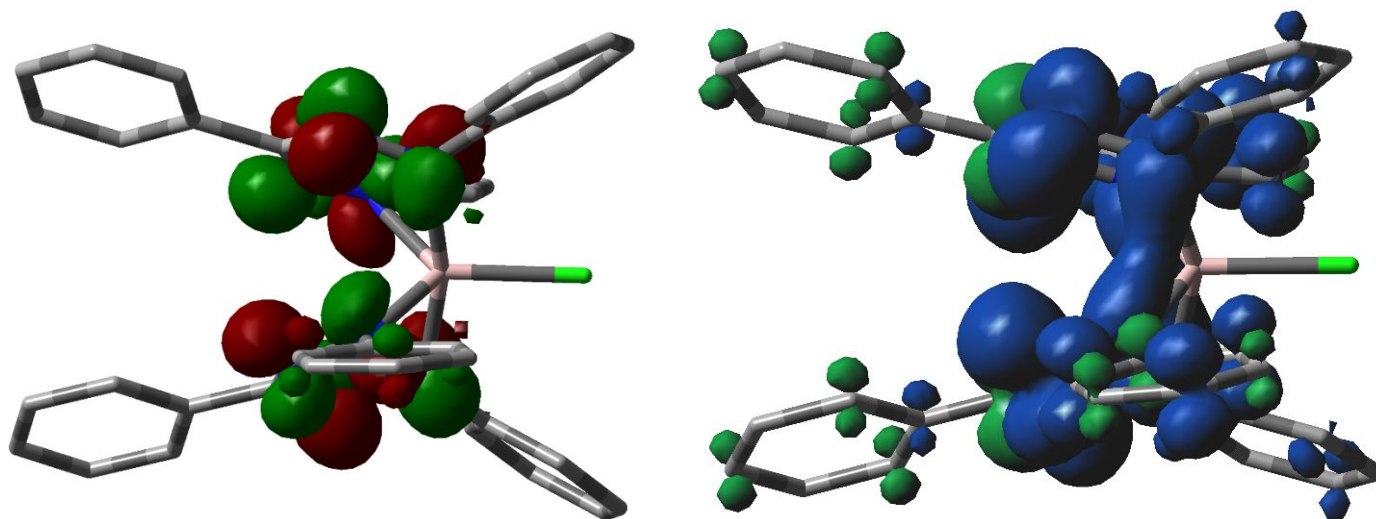

**Figure S14.** LUMO of  $\mathbf{1}_{\text{calc}}$  (left) and spin density plot of  $\mathbf{1}^{-}_{\text{calc}}$  (right)

**Table S2.** Selected bond lengths values (Å) and bond angles values (°) for  $\mathbf{1}$ ,  $\mathbf{1}_{\text{calc}}$  and  $\mathbf{1}^{-}_{\text{calc}}$

| Bonds    | Bond lengths |                            |                                | Angles     | Bonds angles |                            |                                |
|----------|--------------|----------------------------|--------------------------------|------------|--------------|----------------------------|--------------------------------|
|          | $\mathbf{1}$ | $\mathbf{1}_{\text{calc}}$ | $\mathbf{1}^{-}_{\text{calc}}$ |            | $\mathbf{1}$ | $\mathbf{1}_{\text{calc}}$ | $\mathbf{1}^{-}_{\text{calc}}$ |
| A11 -C11 | 2.143(1)     | 2.163                      | 2.196                          | N1-A11-N8  | 165.22(1)    | 165.872                    | 155.128                        |
| A11 -N1  | 1.999(4)     | 2.049                      | 2.038                          | N1-A11-C11 | 97.72(1)     | 97.063                     | 102.436                        |
| A11 -N8  | 2.007(4)     | 2.049                      | 2.038                          | N1-A11-N4  | 81.29(1)     | 81.33                      | 82.123                         |
| A11 -N4  | 1.923(3)     | 1.953                      | 1.968                          | N8-A11-C11 | 97.03(1)     | 97.065                     | 102.436                        |
| A11 -N5  | 1.921(3)     | 1.953                      | 1.968                          | N8-A11-N5  | 81.89(1)     | 81.332                     | 82.123                         |
| N1-N2    | 1.316(4)     | 1.291                      | 1.327                          | N4-A11-N5  | 106.65(1)    | 109.288                    | 128.33                         |
| N7-N8    | 1.307(4)     | 1.291                      | 1.327                          | C11-A11-N4 | 127.10(1)    | 125.352                    | 115.84                         |
| N3-N4    | 1.320(4)     | 1.31                       | 1.338                          | C11-A11-N5 | 126.25(1)    | 125.36                     | 115.84                         |
| N5-N6    | 1.322(4)     | 1.31                       | 1.338                          | A11-N1-N2  | 118.48(3)    | 118.732                    | 116.267                        |

|        |          |       |       |            |           |         |         |
|--------|----------|-------|-------|------------|-----------|---------|---------|
| N2-C7  | 1.350(5) | 1.349 | 1.343 | A11-N1-C1  | 130.36(3) | 129.317 | 129.63  |
| N7-C27 | 1.352(5) | 1.349 | 1.343 | N2-N1-C1   | 110.65(3) | 111.139 | 111.068 |
| N6-C27 | 1.342(5) | 1.336 | 1.342 | A11-N8-N7  | 118.31(3) | 118.736 | 116.268 |
| N3-C7  | 1.343(5) | 1.336 | 1.342 | A11-N8-C35 | 129.74(3) | 129.311 | 129.629 |
| N1-C1  | 1.440(5) | 1.442 | 1.425 | N7-N8-C35  | 110.53(3) | 113.14  | 111.067 |
| N8-C35 | 1.439(5) | 1.442 | 1.425 | A11-N4-N3  | 119.64(3) | 119.963 | 116.424 |
| N4-C15 | 1.436(5) | 1.429 | 1.415 | A11-N4-C15 | 125.51(3) | 125.178 | 128.061 |
| N5-C21 | 1.432(5) | 1.429 | 1.415 | N3-N4-C15  | 112.69(3) | 113.841 | 112.664 |
|        |          |       |       | A11-N5-N6  | 119.48(3) | 119.962 | 116.425 |
|        |          |       |       | A11-N5-C21 | 124.28(3) | 125.179 | 128.06  |
|        |          |       |       | N6-N5-C21  | 113.75(3) | 113.841 | 112.663 |

**Table S3.** Selected bond lengths values (Å) for **4**, **4<sup>2-</sup>** and **5** measured by X-ray crystallography

| Bonds   | Bond lengths |                       |          |
|---------|--------------|-----------------------|----------|
|         | <b>4</b>     | <b>4<sup>2-</sup></b> | <b>5</b> |
| A11-N1  | 1.9336(9)    | 1.871(2)              | 1.893(2) |
| A11-N4  | 1.9334(8)    | 1.873(2)              | 1.900(2) |
| A11-C21 | 1.962(1)     | 2.011(2)              |          |
| A11-C27 | 1.957(1)     | 2.008(2)              |          |
| A11-I1  |              |                       | 2.497(7) |
| A11-I2  |              |                       | 2.494(7) |
| N1-N2   | 1.315(1)     | 1.432(2)              | 1.317(2) |
| N3-N4   | 1.307(1)     | 1.432(2)              | 1.313(2) |



|        |          |          |          |
|--------|----------|----------|----------|
| N2-C7  | 1.346(1) | 1.332(2) | 1.344(3) |
| C7-N3  | 1.347(1) | 1.328(2) | 1.346(3) |
| N1-C1  | 1.433(1) | 1.375(2) | 1.432(3) |
| N4-C15 | 1.430(1) | 1.371(3) | 1.433(3) |

**Table S4.** Selected bond angles values ( $^{\circ}$ ) for **4**, **4<sup>2-</sup>** and **5** measured by X-ray crystallography

| Angles      | Bond angles |                       | Angles     | Bond angles |  |
|-------------|-------------|-----------------------|------------|-------------|--|
|             | <b>4</b>    | <b>4<sup>2-</sup></b> |            | <b>5</b>    |  |
| N1-A11-N4   | 90.01(4)    | 98.54(7)              | N1-A11-N4  | 92.83(8)    |  |
| C21-A11-C27 | 120.06(5)   | 107.34(8)             | I1-A11-I2  | 112.66(2)   |  |
| C21-A11-N1  | 112.96(4)   | 115.58(7)             | I1-A11-N1  | 112.65(6)   |  |
| C21-A11-N4  | 112.11(4)   | 108.46(7)             | I1-A11-N4  | 113.41(6)   |  |
| C27-A11-N1  | 109.57(4)   | 109.96(7)             | I2-A11-N1  | 111.34(6)   |  |
| C27-A11-N4  | 108.01(4)   | 117.14(7)             | I2-A11-N4  | 112.46(6)   |  |
| A11-N1-N2   | 123.89(7)   | 122.6(1)              | A11-N1-N2  | 124.7(1)    |  |
| A11-N1-C1   | 123.57(7)   | 126.2(1)              | A11-N1-C1  | 122.6(1)    |  |
| C1-N1-N2    | 112.26(8)   | 111.2(1)              | C1-N1-N2   | 112.7(2)    |  |
| N3-N4-A11   | 124.93(7)   | 123.6(1)              | N3-N4-A11  | 123.8(1)    |  |
| A11-N4-C15  | 122.66(7)   | 125.1(1)              | A11-N4-C15 | 123.5(1)    |  |
| N3-N4-C15   | 112.28(8)   | 110.9(1)              | N3-N4-C15  | 112.6(2)    |  |
| N1-N2-C7    | 121.62(9)   | 118.6(1)              | N1-N2-C7   | 121.2(2)    |  |
| N4-N3-C7    | 121.09(9)   | 118.1(1)              | N4-N3-C7   | 121.7(2)    |  |
| N2-C7-N3    | 129.06(9)   | 137.2(2)              | N2-C7-N3   | 129.2(2)    |  |
